# Supplementary material for: CRISPR/Cas9-Mediated TERT Disruption in Cancer Cells
Source: PubMed Central journal article supplement (PMC7014288; doi:10.3390/ijms21020653), 2020-01-19
Supplement: ijms-21-00653-s001.pdf [file ijms-21-00653-s001.pdf]

1 **Supplementary Figures and Tables**

2

3 **Title:**

4 CRISPR/Cas9-Mediated TERT Disruption in Cancer Cells

5 **Authors**

6 Luan Wen <sup>1,#,\*</sup>, Changzhi Zhao <sup>1,#</sup>, Jun Song <sup>1</sup>, Linyuan Ma <sup>1</sup>, Jinxue Ruan <sup>1</sup>, Xiaofeng Xia <sup>2</sup>, Y.

7 Eugene Chen <sup>1</sup>, Jifeng Zhang <sup>1</sup>, Peter X. Ma <sup>3</sup> and Jie Xu <sup>1,\*</sup>

8

9

10 **Supplementary Figure S1.** Expressions of telomerase genes and relative telomere contents in  
11 different cell lines. (A) Relative expression levels of TERT and TERC in hiPS, HASMC, HeLa,  
12 PANC1, and SUM159 cells. (B) Relative telomere content determined by T/S ratio in hiPS,  
13 HASMC, HeLa, PANC1, and SUM159 cells.

14

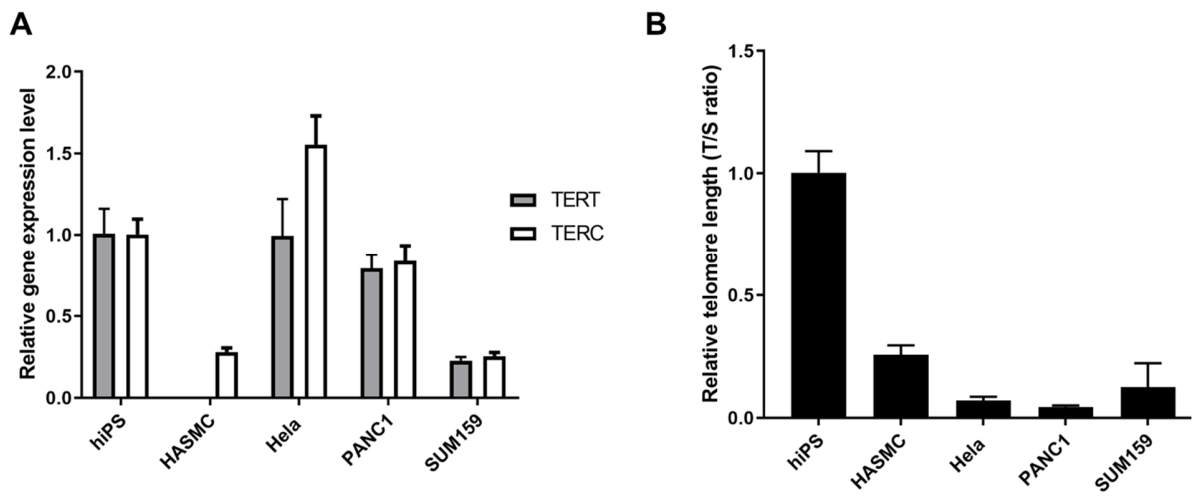

15

16

17 **Supplementary S2.** Western blot analysis of TERT protein expression in WTPE and Tert<sup>+/-</sup> HeLa and  
18 PANC1 cells reveal lower signals in Tert<sup>+/-</sup> than those in WTPE in HeLa (left panel) and PANC1 (right  
19 panel) cells.

20

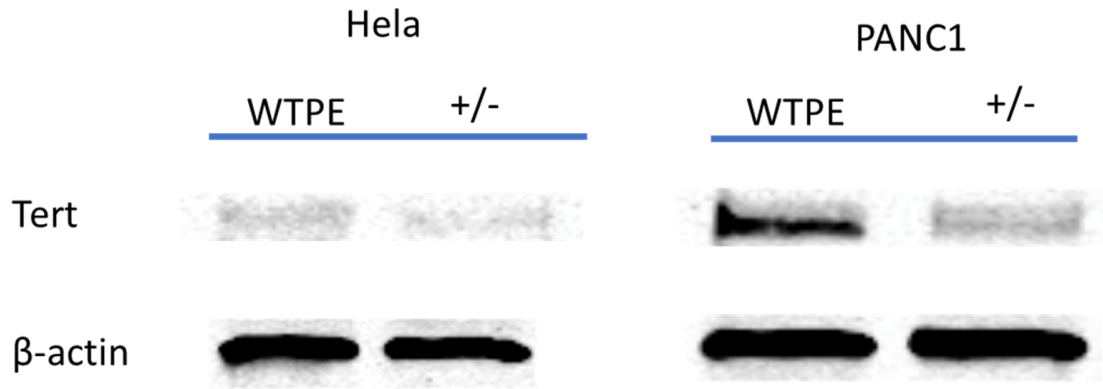

21

22 **Supplementary Figure S3.** Efficacy of TERT disruption in suppressing growth of breast cancer  
 23 line SKBR3 cells in vitro. (A) Cas9 mediated TERT disruption by sg4 (blue dots) or sg5 (red dots)  
 24 alone has no additive growth inhibiting effects on SKBR3 cells in the presence of Herceptin (green  
 25 dots) of concentrations ranging from 0.015 to 33  $\mu\text{g/mL}$ . (B) Cas9 mediated TERT disruption by  
 26 the exon removal strategy (using both sg4 and sg5, red dots) enhances the efficacy of Herceptin  
 27 (green dots) of concentrations ranging from 0.4 to 33  $\mu\text{g/mL}$  in inhibiting the growth of breast  
 28 cancer line SKBR3 cells. \*  $P < 0.05$ . \*\*  $P < 0.01$ .

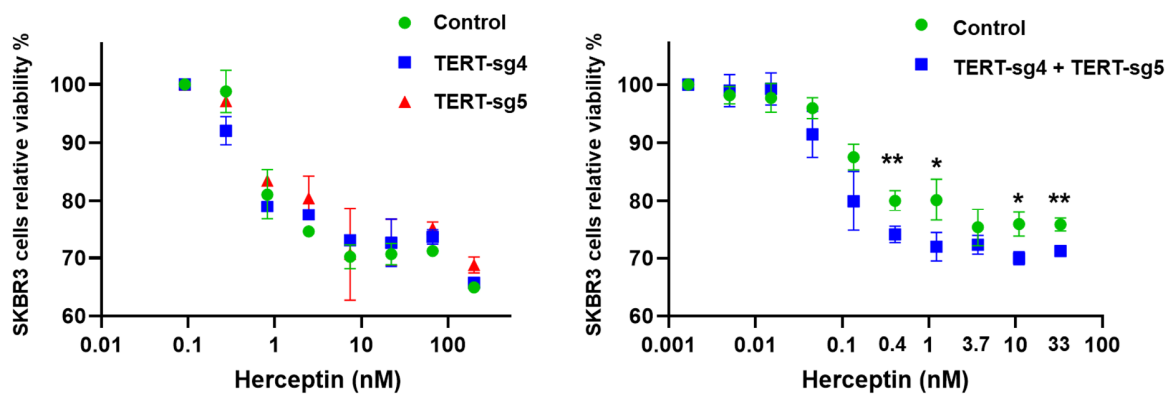

29

30

31 **Supplementary Table S1.** Off-target analysis of sg4 and sg5 in HeLa cells. Blue colored letters  
 32 indicate the PAM sequence. Red highlighted letters marked the differences of the gRNA with the  
 33 target sequence. Indel column shows the detected off target results. No off-target edits were  
 34 detected in all the loci tested for sg4 (n=9) and sg5 (n=9).

35

| Genomic location           | Locus details                         | Sequence                   | Indel |
|----------------------------|---------------------------------------|----------------------------|-------|
| <b>sg4</b>                 |                                       |                            |       |
| on target                  | Intron: Tert                          | TCAGCCAGACAACAGACTAG GGG   |       |
| off-targets                |                                       |                            |       |
| Chr9: 110141708-110141730  | intron: PALM2-AKAP2/AKAP2             | TGAGTCACACAACA AACTAG TGG  | no    |
| Chr4: 162701165-162701187  | intergenic: FSTL5-AC005150.3          | TCAGCAAGACGGCTGACTAG AGG   | no    |
| Chr5: 171194393-171194415  | intron: RANBP17                       | ACAGACAGAAAACAGATTAG TGG   | no    |
| Chr4: 113606577-113606599  | intron: CAMK2D                        | ACAGAAAGACAACAGACTAC GGG   | no    |
| Chr2: 235792702-235792724  | intergenic: AC064874.1-AGAP1          | TGAGCTAGAAAACAGACGAG AGG   | no    |
| Chr11: 102361958-102361980 | intron: BIRC2                         | TCAGCAAGACAGCAGACTAG GAG   | no    |
| Chr1: 89114677-89114699    | intron: GBP2                          | TAAGCCAGACACCAGACTAG TGA   | no    |
| Chr14: 74532057-74532079   | intron: LTBP2                         | TCAGCCAGACATCAGAGCAG AGG   | no    |
| Chr7: 96705111-96705133    | intron: SHFM1                         | TGAGGCAGACAACAGACTGG TGA   | no    |
| <b>sg5</b>                 |                                       |                            |       |
| on target                  | Intron: Tert                          | CCTCCAGAAAAGCAGCGTGG GGG   | no    |
| off-targets                |                                       |                            |       |
| Chr5: 61144587-61144609    | intergenic: CTC-436P18.4-NDUFAF2      | GCTCCAGAGAAGCAGAAATGG TGG  | no    |
| Chr11: 127252553-127252575 | intergenic: CTD-2234N14.1-RP11-480C22 | CCTCCCTGGAAAAGCAAAGTGG GGG | no    |
| Chr4: 156257157-156257179  | intergenic: CTSO-AC108211.1           | GCTCCAGAAAGAGCAGCGTGG TGG  | no    |
| Chr10: 104560185-104560207 | intergenic: RP11-127O4.3-RP11-127O4.2 | CCTCCAGCATAGCAGCGTGG GGG   | no    |
| ChrX: 4912396-4912418      | intergenic: AC074035.1-SNORA20        | TCTCCAGAACAGCAGCATGG GGG   | no    |
| Chr11: 16481443-16481465   | intergenic: SOX6-RN7SL188P            | CTTCCAGAACAGCAGAGTGG TGG   | no    |
| Chr17: 18017527-18017549   | intergenic: LRRC48-ATPAF2             | CCTCCAGAAAGAGCAGAGTGC AGG  | no    |
| Chr8: 89901981-89902003    | exon: OSGIN2                          | CTTCCATAAAAAGAAGCGTGG TGG  | no    |
| Chr17: 3515883-3515905     | intron: TRPV3                         | CCTCCA AAAAAGCAGAGAGA GGG  | no    |

36

37

38

39 **Supplementary Table S2.** Primers used in the present work.

| <b>Primers for amplification of gRNA edited sequences</b> |                                                                                                                |
|-----------------------------------------------------------|----------------------------------------------------------------------------------------------------------------|
| Primers for gRNA1 edited products:                        | Forward 5' -AAGAACGTGCTGGCCTTCG-3'<br>Reverse 5' -AGCCACCAGCACAAAGAGC-3'                                       |
| Primers for gRNA2 edited products                         | Forward 5' -GGGGCTCAAACGCACTTCT-3'<br>Reverse 5' -ACGTCCAGACTCCGCTTCAT-3'                                      |
| Primers for gRNA3 edited products                         | Forward 5' -CGTGAACCTTACGTGGCTCTT-3'<br>Reverse 5' -ACTCACACAGGTGGATGTGAC-3'                                   |
| Primers for gRNA4 edited products                         | Forward 5' -AGCTGATTCTGCTCCTTGGC-3'<br>Reverse 5' -TCCCACGACGTAGTCCATGT-3'                                     |
| Primers for gRNA5 edited products                         | Forward 5' -GTCTGTTGTCTGGCTGAGCA-3'<br>Reverse 5' -GTTTGAAACGGGTTCCCTGGC-3'                                    |
| <b>Primers for detection of E4 removal</b>                |                                                                                                                |
|                                                           | Forward 5' -GAAGGGATGTGGCTCTTTCTACCTG-3'<br>Reverse 5' -CTCACCCACACTCTCCTCAGATG-3'                             |
| <b>Primers for T/S ratio analysis</b>                     |                                                                                                                |
| Primers for T/S ratio                                     | Forward 5' -GGTTTTTGAGGGTGAGGGTGAGGGTGAGGGTGAGGGT-3'<br>Reverse 5' -TCCCGACTATCCCTATCCCTATCCCTATCCCTATCCCTA-3' |
| Primers for internal control 36B4                         | Forward 5' -CAGCAAGTGGGAAGGTGTAATCC-3'<br>Reverse 5' -CCCATTCTATCATCAACGGGTACAA-3'                             |
| <b>Primers for off-target (OT) analysis</b>               |                                                                                                                |
| Sg4-OT1                                                   | Forward 5' -TGTTGTCCATCAGGCTTCCC-3'<br>Reverse 5' -CATTTCCACACCAGGGGGAT-3'                                     |
| Sg4-OT2                                                   | Forward 5' -GATAGCTTGGGGCACTGTGA-3'<br>Reverse 5' -GATAGCTTGGGGCACTGTGA-3'                                     |
| Sg4-OT3                                                   | Forward 5' -AGCTAATCACCTCCGCTGTG-3'<br>Reverse 5' -TTCCCCCAACTCCCCAGTAA-3'                                     |
| Sg4-OT4                                                   | Forward 5' -TCCCTGCGTTCCAATAACCTC-3'<br>Reverse 5' -TTGCTCATGTGGCCGTAGTT-3'                                    |
| Sg4-OT5                                                   | Forward 5' -CTGTGGTGTGTTAGGGGCAT-3'<br>Reverse 5' -CATGGTCACTGGGAGTGGTC-3'                                     |
| Sg4-OT6                                                   | Forward 5' -AAGCTGTCAGTGTCTCTGC-3'<br>Reverse 5' -AGCGTCTGCACCTACAAAGG-3'                                      |
| Sg4-OT7                                                   | Forward 5' -CTGTCTCCAGCGTTTCGAGT-3'                                                                            |

|         |                                                                                |
|---------|--------------------------------------------------------------------------------|
|         | Reverse 5' -CACTGCTGATGGCATTGACG-3'                                            |
| Sg4-OT8 | Forward 5' -GGTGGACAGTGGGAGACAAG-3'<br>Reverse 5' -CCCTGGAAACCACAGAGGTC-3'     |
| Sg4-OT9 | Forward 5' -GCAAAAGCCCTTTTTGGCAC-3'<br>Reverse 5' -CATACGGTCAGGTTGGTGGT-3'     |
| Sg5-OT1 | Forward 5' -TGGGCCTAAGACTGACTCCT-3'<br>Reverse 5' -CTGGGCTTTGGAAATGCACTC-3'    |
| Sg5-OT2 | Forward 5' -AGAGGTTGGAGATGCCTTGG-3'<br>Reverse 5' -CTGAACTAGGCCAGGAGGTTG-3'    |
| Sg5-OT3 | Forward 5' -ATATGCACCTGCATGCCCTG-3'<br>Reverse 5' -GGACCACCCTGTCACCTCTA-3'     |
| Sg5-OT4 | Forward 5' -GCCACTTGCTCTACGTCACA-3'<br>Reverse 5' -GGAGTCCATCCTCTGGTCCT-3'     |
| Sg5-OT5 | Forward 5' -GCTGGTCTAGGCTTTGCTTG-3'<br>Reverse 5' -GGGAGGCAGAAAAGAGTGTG-3'     |
| Sg5-OT6 | Forward 5' -TCAAGTGGGTTTTGCAGGAGA-3'<br>Reverse 5' -CCAAGTTCATTCCAACCACCATC-3' |
| Sg5-OT7 | Forward 5' -TGGCCAGCAGTGAATGTAGG-3'<br>Reverse 5' -TTGAGATGAACAGCCGGTCC-3'     |
| Sg5-OT8 | Forward 5' -TGCATAACTCTGGGGCAGTC-3'<br>Reverse 5' -CGGCAATCGAGACCTAGACC-3'     |
| Sg5-OT9 | Forward 5' -GATTCCGGATGGGAGAGCTG-3'<br>Reverse 5' -GGTAGGAGGAGGTGGGCTTA-3'     |

40

41
